# Supplementary material for: A6Mo2P4O19 (A = Rb, Cs) and Rb2MoP2O9: new molybdophosphates with distinct polyanionic configurations
Source: Royal Society of Chemistry journal article supplement (doi:10.1039/d1dt03756k), 2021-12-13
Supplement: d1dt03756k5.pdf [file d1dt03756k5.pdf]

**$A_6Mo_2P_4O_{19}$  (A = Rb, Cs) and  $Rb_2MoP_2O_9$ : New molybdophosphates with distinct polyanionic configurations**

Maierhaba Abudoureheman,<sup>\*a</sup> Juanjuan Zheng,<sup>a</sup> Peng Wang,<sup>a</sup> Bo Wei,<sup>a</sup> Zhiyong Guo,<sup>b</sup> Zhaohui Chen,<sup>\*a</sup> Yanna Chen<sup>a</sup>

*a. School of Chemical Engineering and Technology, Key Laboratory of Coal Clean Conversion & Chemical Engineering Process of Xinjiang Uyghur Autonomous Region, Xinjiang University, 666 Shengli Road, Urumqi 830046, China.*

*b. Xuchang Quality and Technical Supervision, Inspection and Testing Center, National Quality Supervision and Inspection Center for Ceramic Products of China, West Section of Longxing Road, Dongcheng District, Xuchang 461000, China*

E-mail: [marhaba714@163.com](mailto:marhaba714@163.com) ( M. Abudoureheman)

[chenzhaohui686@sina.cn](mailto:chenzhaohui686@sina.cn) (Z. H. Chen)

**Table S1.** The final coordinates ( $\times 10^4$ ), Wyck. and equivalent isotropic displacement parameters ( $\text{\AA}^2 \times 10^3$ ) of non-hydrogen atoms for  $\text{Rb}_2\text{MoP}_2\text{O}_9$ ,  $\text{Cs}_2\text{MoP}_2\text{O}_9$ ,  $\text{Rb}_6\text{Mo}_2\text{P}_4\text{O}_{19}$  and  $\text{Cs}_6\text{Mo}_2\text{P}_4\text{O}_{19}$ .  $U_{eq}$  is defined as one-third of the trace of the orthogonalized  $U_{ij}$  tensor, and the Bond Valence Sum (BVS) for each atom in the asymmetric unit.

| Atom                                            | Wyck. | $x$      | $y$     | $z$     | $U_{eq}$ | BVS  |
|-------------------------------------------------|-------|----------|---------|---------|----------|------|
| $\text{Rb}_2\text{MoP}_2\text{O}_9$             |       |          |         |         |          |      |
| Rb(1)                                           | 8f    | 6669(1)  | 2752(1) | 6786(1) | 18(1)    | 1.29 |
| Rb(2)                                           | 8f    | 1847(1)  | 2476(1) | 6432(1) | 21(1)    | 1.07 |
| Rb(3)                                           | 8f    | 44(1)    | 2586(1) | 4729(1) | 25(1)    | 0.97 |
| Mo(1)                                           | 4e    | 0        | 5095(1) | 2500    | 11(1)    | 6.20 |
| Mo(2)                                           | 8f    | 3416(1)  | 5382(1) | 5893(1) | 11(1)    | 6.14 |
| P(1)                                            | 8f    | 1664(1)  | 5781(1) | 3339(1) | 11(1)    | 5.03 |
| P(2)                                            | 8f    | 5131(1)  | 6090(1) | 6686(1) | 12(1)    | 5.03 |
| P(3)                                            | 8f    | 1726(1)  | 5783(1) | 5023(1) | 11(1)    | 5.00 |
| O(1)                                            | 8f    | 1781(1)  | 7614(2) | 3345(1) | 16(1)    | 2.01 |
| O(2)                                            | 8f    | 1645(1)  | 7622(2) | 4947(1) | 17(1)    | 1.96 |
| O(3)                                            | 8f    | 5360(1)  | 7842(2) | 6864(1) | 16(1)    | 1.92 |
| O(4)                                            | 8f    | 2361(1)  | 5360(2) | 5657(1) | 15(1)    | 2.22 |
| O(5)                                            | 8f    | 2066(1)  | 4919(3) | 2782(1) | 19(1)    | 1.99 |
| O(6)                                            | 8f    | 1960(1)  | 5109(2) | 4213(1) | 14(1)    | 2.07 |
| O(7)                                            | 4e    | 5000     | 5245(3) | 7500    | 18(1)    | 2.08 |
| O(8)                                            | 8f    | 1091(1)  | 4930(3) | 5212(1) | 21(1)    | 1.92 |
| O(9)                                            | 8f    | 877(1)   | 5391(3) | 3252(1) | 19(1)    | 2.10 |
| O(10)                                           | 8f    | 5654(1)  | 5116(3) | 6327(1) | 20(1)    | 2.00 |
| O(11)                                           | 8f    | 4416(1)  | 6063(3) | 6143(1) | 20(1)    | 2.06 |
| O(12)                                           | 8f    | 362(1)   | 3819(3) | 1888(1) | 22(1)    | 2.15 |
| O(13)                                           | 8f    | 3539(1)  | 4110(3) | 5141(1) | 22(1)    | 2.05 |
| O(14)                                           | 8f    | 3417(1)  | 4082(3) | 6666(1) | 22(1)    | 2.03 |
| $\text{Cs}_2\text{MoP}_2\text{O}_9$             |       |          |         |         |          |      |
| Cs(1)                                           | 8c    | 1439(1)  | 6504(1) | 4435(1) | 26(1)    | 1.15 |
| Cs(2)                                           | 8c    | 1482(1)  | 9768(1) | 2850(1) | 32(1)    | 0.92 |
| Mo(1)                                           | 8c    | 3111(1)  | 4847(1) | 5744(1) | 16(1)    | 6.08 |
| P(1)                                            | 8c    | -1956(2) | 7622(2) | 3311(1) | 18(1)    | 5.04 |
| P(2)                                            | 8c    | -144(2)  | 3018(2) | 3844(1) | 17(1)    | 4.99 |
| O(1)                                            | 8c    | 4253(6)  | 5934(5) | 5373(2) | 28(1)    | 2.07 |
| O(2)                                            | 8c    | 2229(6)  | 3820(5) | 5274(2) | 27(1)    | 2.06 |
| O(3)                                            | 8c    | -1808(6) | 6286(5) | 3643(2) | 25(1)    | 1.88 |
| O(4)                                            | 8c    | -1235(6) | 8914(5) | 3583(2) | 24(1)    | 2.02 |
| O(5)                                            | 8c    | -3874(6) | 7974(5) | 3306(2) | 20(1)    | 2.07 |
| O(6)                                            | 8c    | -1451(6) | 7488(5) | 2756(2) | 29(1)    | 1.94 |
| O(7)                                            | 8c    | 1473(6)  | 3563(5) | 3751(2) | 24(1)    | 1.91 |
| O(8)                                            | 8c    | -119(5)  | 1453(4) | 4047(2) | 19(1)    | 2.12 |
| O(9)                                            | 8c    | -1132(5) | 3892(4) | 4240(2) | 17(1)    | 2.11 |
| $\text{Rb}_6\text{Mo}_2\text{P}_4\text{O}_{19}$ |       |          |         |         |          |      |
| Rb(1)                                           | 4e    | 2339(1)  | 3365(1) | 5537(1) | 13(1)    | 1.20 |

|                                                                |    |         |          |         |       |      |
|----------------------------------------------------------------|----|---------|----------|---------|-------|------|
| Rb(2)                                                          | 4e | 4844(1) | 8420(1)  | 6367(1) | 36(1) | 0.98 |
| Rb(3)                                                          | 4e | 8903(1) | -722(1)  | 2094(1) | 24(1) | 0.99 |
| Mo(1)                                                          | 4e | 8622(1) | 1586(1)  | 4901(1) | 23(1) | 6.16 |
| P(1)                                                           | 4e | 7965(2) | 592(2)   | 6764(1) | 32(1) | 4.95 |
| P(2)                                                           | 4e | 6099(2) | 3149(2)  | 6113(1) | 23(1) | 5.00 |
| O(1)                                                           | 4e | 4860(5) | 2327(8)  | 5824(4) | 66(3) | 1.96 |
| O(2)                                                           | 4e | 6112(6) | 4992(7)  | 6533(4) | 40(2) | 1.84 |
| O(3)                                                           | 4e | 6711(5) | 1817(7)  | 6946(3) | 41(2) | 2.10 |
| O(4)                                                           | 4e | 8232(5) | -512(7)  | 7627(4) | 34(2) | 1.95 |
| O(5)                                                           | 4e | 9012(5) | 1927(6)  | 6461(3) | 36(1) | 1.94 |
| O(6)                                                           | 4e | 7646(5) | -449(6)  | 5839(3) | 32(2) | 1.95 |
| O(7)                                                           | 2c | 10000   | 0        | 5000    | 38(2) | 2.35 |
| O(8)                                                           | 4e | 9455(5) | 3419(8)  | 4529(4) | 36(1) | 2.13 |
| O(9)                                                           | 4e | 7914(5) | 700(8)   | 3893(4) | 14(6) | 2.11 |
| O(10)                                                          | 4e | 7067(5) | 3050(7)  | 5279(4) | 48(2) | 2.15 |
| Cs <sub>6</sub> Mo <sub>2</sub> P <sub>4</sub> O <sub>19</sub> |    |         |          |         |       |      |
| Cs(1)                                                          | 4e | 4835(1) | 1648(1)  | 8610(1) | 27(1) | 0.96 |
| Cs(2)                                                          | 4e | 7655(1) | 1583(1)  | 5550(1) | 27(1) | 1.16 |
| Cs(3)                                                          | 4e | 8916(1) | 733(1)   | 2923(1) | 27(1) | 1.02 |
| Mo(1)                                                          | 4e | 1352(1) | 1532(1)  | 9928(1) | 17(1) | 6.09 |
| P(1)                                                           | 4e | 7980(1) | -626(1)  | 8279(1) | 18(1) | 4.90 |
| P(2)                                                           | 4e | 3841(1) | 1930(1)  | 6084(1) | 18(1) | 4.97 |
| O(1)                                                           | 4e | 8217(3) | 413(4)   | 7440(2) | 29(1) | 1.92 |
| O(2)                                                           | 4e | 2886(3) | 2069(4)  | 5281(2) | 26(1) | 2.13 |
| O(3)                                                           | 4e | 7700(3) | 396(3)   | 9166(2) | 21(1) | 1.92 |
| O(4)                                                           | 4e | 2029(3) | 732(4)   | 8947(2) | 33(1) | 2.07 |
| O(5)                                                           | 4e | 6762(3) | -1816(4) | 8105(2) | 24(1) | 2.10 |
| O(6)                                                           | 4e | 550(3)  | 3331(4)  | 9599(2) | 33(1) | 2.12 |
| O(7)                                                           | 2a | 0       | 0        | 10000   | 36(1) | 2.27 |
| O(8)                                                           | 4e | 3833(3) | 158(4)   | 6468(2) | 36(1) | 1.87 |
| O(9)                                                           | 4e | 9019(3) | -1892(4) | 8577(2) | 22(1) | 1.91 |
| O(10)                                                          | 4e | 5055(3) | 2720(4)  | 5823(2) | 36(1) | 1.92 |

**Table S2a.** Selected bond distances (Å) and bond angles (deg.) for Rb<sub>2</sub>MoP<sub>2</sub>O<sub>9</sub>.

|                |            |                        |           |
|----------------|------------|------------------------|-----------|
| Mo(1)-O(12)#1  | 1.694(2)   | O(13)#4-Rb(2)-O(8)     | 69.21(6)  |
| Mo(1)-O(12)    | 1.694(2)   | O(10)#12-Rb(2)-O(8)    | 95.63(5)  |
| Mo(1)-O(9)#1   | 1.9771(18) | O(3)#12-Rb(2)-O(8)     | 74.73(5)  |
| Mo(1)-O(3)#2   | 2.171(2)   | O(4)-Rb(2)-O(5)#13     | 76.53(5)  |
| Mo(1)-O(3)#3   | 2.171(2)   | O(13)#4-Rb(2)-O(5)#13  | 162.24(6) |
| Mo(1)-Rb(1)#4  | 4.2761(3)  | O(10)#12-Rb(2)-O(5)#13 | 120.45(6) |
| Mo(1)-Rb(1)#5  | 4.2761(3)  | O(5)#4-Rb(2)-O(5)#13   | 96.01(2)  |
| Mo(1)-Rb(3)#1  | 4.3090(4)  | O(3)#12-Rb(2)-O(5)#13  | 77.65(5)  |
| Mo(1)-Rb(3)    | 4.3090(4)  | O(8)-Rb(2)-O(5)#13     | 93.08(5)  |
| Mo(2)-O(14)    | 1.694(2)   | O(4)-Rb(2)-O(14)       | 50.78(5)  |
| Mo(2)-O(13)    | 1.694(2)   | O(13)#4-Rb(2)-O(14)    | 113.01(6) |
| Mo(2)-O(11)    | 1.9817(19) | O(10)#12-Rb(2)-O(14)   | 163.21(5) |
| Mo(2)-O(4)     | 2.0064(18) | O(5)#4-Rb(2)-O(14)     | 68.97(5)  |
| Mo(2)-O(1)#2   | 2.1578(19) | O(3)#12-Rb(2)-O(14)    | 143.93(6) |
| Mo(2)-O(2)#2   | 2.163(2)   | O(8)-Rb(2)-O(14)       | 98.96(5)  |
| Mo(2)-Rb(2)    | 4.0442(4)  | O(5)#13-Rb(2)-O(14)    | 67.13(5)  |
| Mo(2)-Rb(3)#4  | 4.0794(4)  | O(4)-Rb(2)-O(1)#13     | 121.90(5) |
| Mo(2)-Rb(3)#6  | 4.3281(4)  | O(13)#4-Rb(2)-O(1)#13  | 147.74(6) |
| Mo(2)-Rb(1)#7  | 4.3339(4)  | O(10)#12-Rb(2)-O(1)#13 | 84.57(5)  |
| Rb(1)-O(10)    | 2.775(2)   | O(5)#4-Rb(2)-O(1)#13   | 70.70(5)  |
| Rb(1)-O(5)#8   | 2.803(2)   | O(3)#12-Rb(2)-O(1)#13  | 65.89(5)  |
| Rb(1)-O(12)#8  | 2.845(2)   | O(8)-Rb(2)-O(1)#13     | 126.92(5) |
| Rb(1)-O(14)#9  | 2.882(2)   | O(5)#13-Rb(2)-O(1)#13  | 45.78(5)  |
| Rb(1)-O(1)#10  | 3.028(2)   | O(14)-Rb(2)-O(1)#13    | 93.20(5)  |
| Rb(1)-O(5)#10  | 3.088(2)   | O(4)-Rb(2)-O(6)#4      | 93.84(5)  |
| Rb(1)-O(2)#11  | 3.131(2)   | O(13)#4-Rb(2)-O(6)#4   | 61.95(5)  |
| Rb(1)-O(4)#11  | 3.167(2)   | O(10)#12-Rb(2)-O(6)#4  | 97.15(5)  |
| Rb(1)-P(3)#11  | 3.4254(8)  | O(5)#4-Rb(2)-O(6)#4    | 44.87(5)  |
| Rb(1)-P(1)#10  | 3.4496(7)  | O(3)#12-Rb(2)-O(6)#4   | 146.06(5) |
| Rb(1)-O(8)#11  | 3.590(2)   | O(8)-Rb(2)-O(6)#4      | 117.05(5) |
| Rb(1)-Rb(2)#9  | 3.8564(4)  | O(5)#13-Rb(2)-O(6)#4   | 129.51(5) |
| Rb(2)-O(4)     | 2.942(2)   | O(14)-Rb(2)-O(6)#4     | 68.77(5)  |
| Rb(2)-O(13)#4  | 2.975(2)   | O(1)#13-Rb(2)-O(6)#4   | 115.54(5) |
| Rb(2)-O(10)#12 | 2.979(2)   | O(8)-Rb(3)-O(12)#1     | 97.02(6)  |
| Rb(2)-O(5)#4   | 3.027(2)   | O(8)-Rb(3)-O(8)#14     | 91.13(5)  |
| Rb(2)-O(3)#12  | 3.0624(19) | O(12)#1-Rb(3)-O(8)#14  | 72.73(6)  |
| Rb(2)-O(8)     | 3.095(2)   | O(8)-Rb(3)-O(13)#4     | 72.26(6)  |
| Rb(2)-O(5)#13  | 3.119(2)   | O(12)#1-Rb(3)-O(13)#4  | 109.83(6) |
| Rb(2)-O(14)    | 3.255(2)   | O(8)#14-Rb(3)-O(13)#4  | 163.34(6) |

---

|                |            |                         |           |
|----------------|------------|-------------------------|-----------|
| Rb(2)-O(1)#13  | 3.284(2)   | O(8)-Rb(3)-O(10)#4      | 154.79(6) |
| Rb(2)-O(6)#4   | 3.4124(19) | O(12)#1-Rb(3)-O(10)#4   | 70.04(6)  |
| Rb(2)-P(2)#12  | 3.5662(7)  | O(8)#14-Rb(3)-O(10)#4   | 104.70(5) |
| Rb(2)-P(3)     | 3.6017(8)  | O(13)#4-Rb(3)-O(10)#4   | 91.39(5)  |
| Rb(3)-O(8)     | 2.811(2)   | O(8)-Rb(3)-O(11)#12     | 112.72(6) |
| Rb(3)-O(12)#1  | 2.933(2)   | O(12)#1-Rb(3)-O(11)#12  | 141.92(5) |
| Rb(3)-O(8)#14  | 2.989(2)   | O(8)#14-Rb(3)-O(11)#12  | 83.08(6)  |
| Rb(3)-O(13)#4  | 3.030(2)   | O(13)#4-Rb(3)-O(11)#12  | 101.79(6) |
| Rb(3)-O(10)#4  | 3.035(2)   | O(10)#4-Rb(3)-O(11)#12  | 88.94(6)  |
| Rb(3)-O(11)#12 | 3.108(2)   | O(8)-Rb(3)-O(2)#14      | 130.48(6) |
| Rb(3)-O(2)#14  | 3.368(2)   | O(12)#1-Rb(3)-O(2)#14   | 92.37(5)  |
| Rb(3)-O(10)#12 | 3.457(2)   | O(8)#14-Rb(3)-O(2)#14   | 46.08(5)  |
| Rb(3)-P(2)#12  | 3.5369(8)  | O(13)#4-Rb(3)-O(2)#14   | 146.98(5) |
| Rb(3)-O(11)#4  | 3.553(2)   | O(10)#4-Rb(3)-O(2)#14   | 73.08(5)  |
| Rb(3)-O(3)#12  | 3.611(2)   | O(11)#12-Rb(3)-O(2)#14  | 50.36(5)  |
| Rb(3)-P(3)#14  | 3.7286(7)  | O(8)-Rb(3)-O(10)#12     | 91.22(5)  |
| P(1)-O(5)      | 1.485(2)   | O(12)#1-Rb(3)-O(10)#12  | 162.81(6) |
| P(1)-O(1)      | 1.515(2)   | O(8)#14-Rb(3)-O(10)#12  | 122.34(5) |
| P(1)-O(9)      | 1.5283(19) | O(13)#4-Rb(3)-O(10)#12  | 58.50(5)  |
| P(1)-O(6)      | 1.613(2)   | O(10)#4-Rb(3)-O(10)#12  | 96.44(5)  |
| P(1)-Rb(1)#10  | 3.4497(7)  | O(11)#12-Rb(3)-O(10)#12 | 43.88(5)  |
| P(1)-Rb(2)#15  | 3.6140(8)  | O(2)#14-Rb(3)-O(10)#12  | 93.70(5)  |
| P(1)-Rb(2)#4   | 3.8824(7)  | O(8)-Rb(3)-O(11)#4      | 117.09(5) |
| P(1)-Rb(1)#5   | 3.9199(8)  | O(12)#1-Rb(3)-O(11)#4   | 87.08(6)  |
| P(2)-O(10)     | 1.481(2)   | O(8)#14-Rb(3)-O(11)#4   | 147.40(5) |
| P(2)-O(3)      | 1.516(2)   | O(13)#4-Rb(3)-O(11)#4   | 48.22(5)  |
| P(2)-O(11)     | 1.5408(19) | O(10)#4-Rb(3)-O(11)#4   | 43.23(5)  |
| P(2)-O(7)      | 1.6023(14) | O(11)#12-Rb(3)-O(11)#4  | 99.08(5)  |
| P(2)-Rb(3)#6   | 3.5369(8)  | O(2)#14-Rb(3)-O(11)#4   | 111.86(5) |
| P(2)-Rb(2)#6   | 3.5661(7)  | O(10)#12-Rb(3)-O(11)#4  | 75.73(5)  |
| P(2)-Rb(3)#4   | 3.8380(8)  | P(2)#12-Rb(3)-O(11)#4   | 97.35(4)  |
| P(3)-O(8)      | 1.480(2)   | O(8)-Rb(3)-O(3)#12      | 69.91(5)  |
| P(3)-O(2)      | 1.515(2)   | O(12)#1-Rb(3)-O(3)#12   | 155.67(6) |
| P(3)-O(4)      | 1.5448(19) | O(8)#14-Rb(3)-O(3)#12   | 86.73(5)  |
| P(3)-O(6)      | 1.611(2)   | O(13)#4-Rb(3)-O(3)#12   | 86.27(5)  |
| P(3)-Rb(1)#7   | 3.4254(8)  | O(10)#4-Rb(3)-O(3)#12   | 129.46(5) |
| P(3)-Rb(3)#14  | 3.7286(7)  | O(11)#12-Rb(3)-O(3)#12  | 42.92(5)  |
| O(1)-Mo(2)#2   | 2.1578(19) | O(2)#14-Rb(3)-O(3)#12   | 82.06(5)  |
| O(1)-Rb(1)#10  | 3.028(2)   | O(10)#12-Rb(3)-O(3)#12  | 41.45(5)  |
| O(1)-Rb(2)#15  | 3.284(2)   | P(2)#12-Rb(3)-O(3)#12   | 24.45(3)  |
| O(2)-Mo(2)#2   | 2.163(2)   | O(11)#4-Rb(3)-O(3)#12   | 117.01(5) |

---

---

|                      |            |                        |            |
|----------------------|------------|------------------------|------------|
| O(2)-Rb(1)#7         | 3.132(2)   | O(5)-P(1)-O(1)         | 112.55(12) |
| O(2)-Rb(3)#14        | 3.368(2)   | O(5)-P(1)-O(9)         | 115.84(12) |
| O(3)-Mo(1)#2         | 2.171(2)   | O(1)-P(1)-O(9)         | 110.44(12) |
| O(3)-Rb(2)#6         | 3.0624(19) | O(5)-P(1)-O(6)         | 106.49(11) |
| O(3)-Rb(3)#6         | 3.611(2)   | O(1)-P(1)-O(6)         | 107.39(11) |
| O(4)-Rb(1)#7         | 3.167(2)   | O(9)-P(1)-O(6)         | 103.28(11) |
| O(5)-Rb(1)#5         | 2.803(2)   | O(10)-P(2)-O(3)        | 113.41(12) |
| O(5)-Rb(2)#4         | 3.027(2)   | O(10)-P(2)-O(11)       | 109.89(12) |
| O(5)-Rb(1)#10        | 3.088(2)   | O(3)-P(2)-O(11)        | 109.92(12) |
| O(5)-Rb(2)#15        | 3.119(2)   | O(10)-P(2)-O(7)        | 109.13(12) |
| O(6)-Rb(2)#4         | 3.4124(19) | O(3)-P(2)-O(7)         | 108.14(12) |
| O(7)-P(2)#9          | 1.6022(14) | O(11)-P(2)-O(7)        | 106.08(9)  |
| O(8)-Rb(3)#14        | 2.989(2)   | O(8)-P(3)-O(2)         | 114.08(12) |
| O(8)-Rb(1)#7         | 3.590(2)   | O(8)-P(3)-O(4)         | 109.42(12) |
| O(10)-Rb(2)#6        | 2.979(2)   | O(2)-P(3)-O(4)         | 110.09(11) |
| O(10)-Rb(3)#4        | 3.035(2)   | O(8)-P(3)-O(6)         | 111.49(12) |
| O(10)-Rb(3)#6        | 3.456(2)   | O(2)-P(3)-O(6)         | 107.69(11) |
| O(11)-Rb(3)#6        | 3.108(2)   | O(4)-P(3)-O(6)         | 103.54(11) |
| O(11)-Rb(3)#4        | 3.553(2)   | O(5)#10-Rb(1)-O(4)#11  | 98.16(5)   |
| O(12)-Rb(1)#5        | 2.845(2)   | O(2)#11-Rb(1)-O(4)#11  | 46.92(5)   |
| O(12)-Rb(3)#1        | 2.933(2)   | O(10)-Rb(1)-O(8)#11    | 96.21(5)   |
| O(13)-Rb(2)#4        | 2.975(2)   | O(5)#8-Rb(1)-O(8)#11   | 88.86(5)   |
| O(13)-Rb(3)#4        | 3.030(2)   | O(12)#8-Rb(1)-O(8)#11  | 64.93(6)   |
| O(14)-Rb(1)#9        | 2.882(2)   | O(14)#9-Rb(1)-O(8)#11  | 151.00(5)  |
| O(12)#1-Mo(1)-O(12)  | 104.01(15) | O(1)#10-Rb(1)-O(8)#11  | 94.68(5)   |
| O(12)#1-Mo(1)-O(9)   | 93.57(9)   | O(5)#10-Rb(1)-O(8)#11  | 136.16(5)  |
| O(12)-Mo(1)-O(9)     | 95.08(9)   | O(2)#11-Rb(1)-O(8)#11  | 43.23(5)   |
| O(12)#1-Mo(1)-O(9)#1 | 95.08(9)   | O(4)#11-Rb(1)-O(8)#11  | 42.28(5)   |
| O(12)-Mo(1)-O(9)#1   | 93.57(9)   | O(4)-Rb(2)-O(13)#4     | 89.97(6)   |
| O(9)-Mo(1)-O(9)#1    | 165.92(12) | O(4)-Rb(2)-O(10)#12    | 142.78(6)  |
| O(12)#1-Mo(1)-O(3)#2 | 88.96(9)   | O(13)#4-Rb(2)-O(10)#12 | 64.83(6)   |
| O(12)-Mo(1)-O(3)#2   | 167.01(9)  | O(4)-Rb(2)-O(5)#4      | 117.57(5)  |
| O(9)-Mo(1)-O(3)#2    | 83.29(8)   | O(13)#4-Rb(2)-O(5)#4   | 100.50(6)  |
| O(9)#1-Mo(1)-O(3)#2  | 85.78(8)   | O(10)#12-Rb(2)-O(5)#4  | 94.69(6)   |
| O(12)#1-Mo(1)-O(3)#3 | 167.01(9)  | O(4)-Rb(2)-O(3)#12     | 114.49(5)  |
| O(12)-Mo(1)-O(3)#3   | 88.96(9)   | O(13)#4-Rb(2)-O(3)#12  | 98.10(6)   |
| O(9)-Mo(1)-O(3)#3    | 85.78(8)   | O(10)#12-Rb(2)-O(3)#12 | 48.97(5)   |
| O(9)#1-Mo(1)-O(3)#3  | 83.29(8)   | O(5)#4-Rb(2)-O(3)#12   | 124.24(6)  |
| O(3)#2-Mo(1)-O(3)#3  | 78.07(11)  | O(4)-Rb(2)-O(8)        | 48.20(5)   |
| O(14)-Mo(2)-O(13)    | 102.73(11) | O(10)-Rb(1)-O(1)#10    | 134.79(6)  |
| O(14)-Mo(2)-O(11)    | 96.78(9)   | O(5)#8-Rb(1)-O(1)#10   | 77.58(6)   |

---

|                       |           |                       |           |
|-----------------------|-----------|-----------------------|-----------|
| O(13)-Mo(2)-O(11)     | 95.67(10) | O(12)#8-Rb(1)-O(1)#10 | 147.49(6) |
| O(14)-Mo(2)-O(4)      | 92.09(9)  | O(14)#9-Rb(1)-O(1)#10 | 106.99(6) |
| O(13)-Mo(2)-O(4)      | 95.13(9)  | O(10)-Rb(1)-O(5)#10   | 97.64(6)  |
| O(11)-Mo(2)-O(4)      | 164.16(9) | O(5)#8-Rb(1)-O(5)#10  | 101.60(2) |
| O(14)-Mo(2)-O(1)#2    | 89.28(9)  | O(12)#8-Rb(1)-O(5)#10 | 158.86(6) |
| O(13)-Mo(2)-O(1)#2    | 167.84(9) | O(14)#9-Rb(1)-O(5)#10 | 72.32(6)  |
| O(11)-Mo(2)-O(1)#2    | 84.61(8)  | O(1)#10-Rb(1)-O(5)#10 | 48.15(5)  |
| O(4)-Mo(2)-O(1)#2     | 82.40(8)  | O(10)-Rb(1)-O(2)#11   | 80.40(6)  |
| O(14)-Mo(2)-O(2)#2    | 169.35(9) | O(5)#8-Rb(1)-O(2)#11  | 122.96(6) |
| O(13)-Mo(2)-O(2)#2    | 87.80(9)  | O(12)#8-Rb(1)-O(2)#11 | 99.25(6)  |
| O(11)-Mo(2)-O(2)#2    | 83.59(8)  | O(14)#9-Rb(1)-O(2)#11 | 159.34(6) |
| O(4)-Mo(2)-O(2)#2     | 85.29(8)  | O(1)#10-Rb(1)-O(2)#11 | 78.17(5)  |
| O(1)#2-Mo(2)-O(2)#2   | 80.15(8)  | O(5)#10-Rb(1)-O(2)#11 | 99.03(5)  |
| O(10)-Rb(1)-O(12)#8   | 75.10(6)  | O(10)-Rb(1)-O(4)#11   | 126.67(6) |
| O(5)#8-Rb(1)-O(12)#8  | 77.00(6)  | O(5)#8-Rb(1)-O(4)#11  | 77.70(6)  |
| O(10)-Rb(1)-O(14)#9   | 82.22(6)  | O(12)#8-Rb(1)-O(4)#11 | 102.07(6) |
| O(5)#8-Rb(1)-O(14)#9  | 77.59(6)  | O(14)#9-Rb(1)-O(4)#11 | 150.99(5) |
| O(12)#8-Rb(1)-O(14)#9 | 86.91(6)  | O(1)#10-Rb(1)-O(4)#11 | 52.55(5)  |

Symmetry transformations used to generate equivalent atoms:

#1  $-x, y, -z+1/2$     #2  $-x+1/2, -y+3/2, -z+1$     #3  $x-1/2, -y+3/2, z-1/2$     #4  $-x+1/2, -y+1/2, -z+1$   
#5  $x-1/2, -y+1/2, z-1/2$     #6  $x+1/2, y+1/2, z$     #7  $x-1/2, y+1/2, z$     #8  $x+1/2, -y+1/2, z+1/2$   
#9  $-x+1, y, -z+3/2$     #10  $-x+1, -y+1, -z+1$     #11  $x+1/2, y-1/2, z$     #12  $x-1/2, y-1/2, z$   
#13  $x, -y+1, z+1/2$     #14  $-x, -y+1, -z+1$     #15  $x, -y+1, z-1/2$

**Table S2b.** Selected bond distances (Å) and bond angles (deg.) for Cs<sub>2</sub>MoP<sub>2</sub>O<sub>9</sub>.

|               |          |                     |            |
|---------------|----------|---------------------|------------|
| Cs(1)-O(1)#1  | 3.062(5) | O(8)#2-Cs(1)-O(9)#3 | 111.82(11) |
| Cs(1)-O(7)#2  | 3.131(5) | O(7)-Cs(1)-O(9)#3   | 115.78(11) |
| Cs(1)-O(2)#3  | 3.180(6) | O(9)-Cs(1)-O(9)#3   | 91.00(11)  |
| Cs(1)-O(2)#2  | 3.235(5) | O(2)-Cs(1)-O(9)#3   | 46.09(11)  |
| Cs(1)-O(8)#2  | 3.242(5) | O(1)#1-Cs(1)-O(3)   | 70.07(13)  |
| Cs(1)-O(7)    | 3.257(5) | O(7)#2-Cs(1)-O(3)   | 99.18(13)  |
| Cs(1)-O(9)    | 3.301(5) | O(2)#3-Cs(1)-O(3)   | 49.70(13)  |
| Cs(1)-O(2)    | 3.358(5) | O(2)#2-Cs(1)-O(3)   | 134.95(12) |
| Cs(1)-O(9)#3  | 3.385(5) | O(8)#2-Cs(1)-O(3)   | 125.83(13) |
| Cs(1)-O(3)    | 3.391(5) | O(7)-Cs(1)-O(3)     | 68.97(12)  |
| Cs(1)-O(1)    | 3.391(6) | O(9)-Cs(1)-O(3)     | 48.78(11)  |
| Cs(1)-P(2)#2  | 3.732(3) | O(2)-Cs(1)-O(3)     | 119.17(12) |
| Cs(2)-O(6)#4  | 2.976(5) | O(9)#3-Cs(1)-O(3)   | 121.24(12) |
| Cs(2)-O(4)    | 3.049(5) | O(1)#1-Cs(1)-O(1)   | 115.50(7)  |
| Cs(2)-O(7)#2  | 3.069(5) | O(7)#2-Cs(1)-O(1)   | 95.45(13)  |
| Cs(2)-O(6)#5  | 3.152(5) | O(2)#3-Cs(1)-O(1)   | 119.80(13) |
| Cs(2)-O(6)    | 3.270(5) | O(2)#2-Cs(1)-O(1)   | 53.56(12)  |
| Cs(2)-O(5)#5  | 3.389(5) | O(8)#2-Cs(1)-O(1)   | 63.04(13)  |
| Cs(2)-O(8)#6  | 3.672(5) | O(7)-Cs(1)-O(1)     | 103.46(12) |
| Cs(2)-P(1)    | 3.707(3) | O(9)-Cs(1)-O(1)     | 116.32(12) |
| Cs(2)-P(1)#5  | 3.796(3) | O(2)-Cs(1)-O(1)     | 45.73(12)  |
| Cs(2)-P(1)#4  | 3.994(3) | O(9)#3-Cs(1)-O(1)   | 48.85(12)  |
| Cs(2)-P(2)#6  | 4.181(3) | O(3)-Cs(1)-O(1)     | 164.71(11) |
| Cs(2)-Cs(2)#7 | 4.556(3) | O(6)#4-Cs(2)-O(4)   | 122.18(13) |
| Mo(1)-O(1)    | 1.684(5) | O(6)#4-Cs(2)-O(7)#2 | 134.70(14) |
| Mo(1)-O(2)    | 1.701(5) | O(4)-Cs(2)-O(7)#2   | 82.49(15)  |
| Mo(1)-O(8)#8  | 1.994(4) | O(6)#4-Cs(2)-O(6)#5 | 109.57(14) |
| Mo(1)-O(9)#3  | 2.039(4) | O(4)-Cs(2)-O(6)#5   | 122.01(13) |
| Mo(1)-O(4)#9  | 2.133(5) | O(7)#2-Cs(2)-O(6)#5 | 78.72(13)  |
| Mo(1)-O(3)#3  | 2.176(5) | O(6)#4-Cs(2)-O(6)   | 121.07(7)  |
| Mo(1)-Cs(1)#3 | 4.050(3) | O(4)-Cs(2)-O(6)     | 46.28(13)  |
| Mo(1)-Cs(1)#9 | 4.440(3) | O(7)#2-Cs(2)-O(6)   | 103.56(13) |
| P(1)-O(6)     | 1.472(5) | O(6)#5-Cs(2)-O(6)   | 86.30(13)  |
| P(1)-O(3)     | 1.513(5) | O(6)#4-Cs(2)-O(5)#5 | 88.81(14)  |
| P(1)-O(4)     | 1.520(5) | O(4)-Cs(2)-O(5)#5   | 109.23(12) |
| P(1)-O(5)     | 1.643(5) | O(7)#2-Cs(2)-O(5)#5 | 120.54(13) |
| P(1)-Cs(2)#7  | 3.796(3) | O(6)#5-Cs(2)-O(5)#5 | 44.87(12)  |
| P(1)-Cs(2)#10 | 3.994(3) | O(6)-Cs(2)-O(5)#5   | 63.01(12)  |
| P(2)-O(7)     | 1.469(5) | O(6)#4-Cs(2)-O(8)#6 | 93.07(13)  |



---

|                     |            |                     |            |
|---------------------|------------|---------------------|------------|
| P(2)-O(9)           | 1.537(5)   | O(4)-Cs(2)-O(8)#6   | 48.44(11)  |
| P(2)-O(8)           | 1.554(4)   | O(7)#2-Cs(2)-O(8)#6 | 75.53(13)  |
| P(2)-O(5)#11        | 1.593(5)   | O(6)#5-Cs(2)-O(8)#6 | 153.52(11) |
| P(2)-Cs(1)#12       | 3.732(3)   | O(6)-Cs(2)-O(8)#6   | 93.76(11)  |
| P(2)-Cs(2)#13       | 4.181(3)   | O(5)#5-Cs(2)-O(8)#6 | 153.37(11) |
| O(1)-Cs(1)#9        | 3.062(5)   | O(1)-Mo(1)-O(2)     | 101.6(3)   |
| O(2)-Cs(1)#3        | 3.180(6)   | O(1)-Mo(1)-O(8)#8   | 95.4(2)    |
| O(2)-Cs(1)#12       | 3.235(5)   | O(2)-Mo(1)-O(8)#8   | 99.4(2)    |
| O(3)-Mo(1)#3        | 2.176(5)   | O(1)-Mo(1)-O(9)#3   | 97.2(2)    |
| O(4)-Mo(1)#1        | 2.133(5)   | O(2)-Mo(1)-O(9)#3   | 89.3(2)    |
| O(5)-P(2)#14        | 1.593(5)   | O(8)#8-Mo(1)-O(9)#3 | 162.98(19) |
| O(5)-Cs(2)#7        | 3.389(5)   | O(1)-Mo(1)-O(4)#9   | 88.2(2)    |
| O(6)-Cs(2)#10       | 2.976(5)   | O(2)-Mo(1)-O(4)#9   | 168.3(2)   |
| O(6)-Cs(2)#7        | 3.152(5)   | O(8)#8-Mo(1)-O(4)#9 | 85.96(18)  |
| O(7)-Cs(2)#12       | 3.069(5)   | O(9)#3-Mo(1)-O(4)#9 | 82.97(18)  |
| O(7)-Cs(1)#12       | 3.131(5)   | O(1)-Mo(1)-O(3)#3   | 168.2(2)   |
| O(8)-Mo(1)#15       | 1.994(4)   | O(2)-Mo(1)-O(3)#3   | 90.2(2)    |
| O(8)-Cs(1)#12       | 3.242(5)   | O(8)#8-Mo(1)-O(3)#3 | 83.49(19)  |
| O(8)-Cs(2)#13       | 3.672(5)   | O(9)#3-Mo(1)-O(3)#3 | 81.89(19)  |
| O(9)-Mo(1)#3        | 2.039(4)   | O(4)#9-Mo(1)-O(3)#3 | 80.0(2)    |
| O(9)-Cs(1)#3        | 3.385(5)   | O(6)-P(1)-O(3)      | 115.8(3)   |
| O(1)#1-Cs(1)-O(7)#2 | 86.51(14)  | O(6)-P(1)-O(4)      | 112.7(3)   |
| O(1)#1-Cs(1)-O(2)#3 | 57.18(13)  | O(3)-P(1)-O(4)      | 112.0(3)   |
| O(7)#2-Cs(1)-O(2)#3 | 136.81(12) | O(6)-P(1)-O(5)      | 106.9(3)   |
| O(1)#1-Cs(1)-O(2)#2 | 64.97(13)  | O(3)-P(1)-O(5)      | 104.5(3)   |
| O(7)#2-Cs(1)-O(2)#2 | 75.86(14)  | O(4)-P(1)-O(5)      | 103.5(3)   |
| O(2)#3-Cs(1)-O(2)#2 | 104.29(9)  | O(7)-P(2)-O(9)      | 114.7(3)   |
| O(1)#1-Cs(1)-O(8)#2 | 129.10(12) | O(7)-P(2)-O(8)      | 111.7(3)   |
| O(7)#2-Cs(1)-O(8)#2 | 46.20(12)  | O(9)-P(2)-O(8)      | 107.2(3)   |
| O(2)#3-Cs(1)-O(8)#2 | 172.41(11) | O(7)-P(2)-O(5)#11   | 110.5(3)   |
| O(2)#2-Cs(1)-O(8)#2 | 83.08(12)  | O(9)-P(2)-O(5)#11   | 106.9(3)   |
| O(1)#1-Cs(1)-O(7)   | 138.91(13) | O(8)-P(2)-O(5)#11   | 105.4(3)   |
| O(7)#2-Cs(1)-O(7)   | 102.87(14) | O(7)#2-Cs(1)-O(2)   | 134.55(13) |
| O(2)#3-Cs(1)-O(7)   | 92.91(12)  | O(2)#3-Cs(1)-O(2)   | 88.46(13)  |
| O(2)#2-Cs(1)-O(7)   | 156.08(12) | O(2)#2-Cs(1)-O(2)   | 91.17(13)  |
| O(8)#2-Cs(1)-O(7)   | 79.50(11)  | O(8)#2-Cs(1)-O(2)   | 89.58(12)  |
| O(1)#1-Cs(1)-O(9)   | 102.35(13) | O(7)-Cs(1)-O(2)     | 72.53(13)  |
| O(7)#2-Cs(1)-O(9)   | 137.74(13) | O(9)-Cs(1)-O(2)     | 70.60(12)  |
| O(2)#3-Cs(1)-O(9)   | 48.02(11)  | O(1)#1-Cs(1)-O(9)#3 | 83.33(12)  |
| O(2)#2-Cs(1)-O(9)   | 145.31(12) | O(7)#2-Cs(1)-O(9)#3 | 131.23(12) |
| O(8)#2-Cs(1)-O(9)   | 124.49(11) | O(2)#3-Cs(1)-O(9)#3 | 71.70(12)  |

---

---

|                   |            |                     |           |
|-------------------|------------|---------------------|-----------|
| O(7)-Cs(1)-O(9)   | 45.40(12)  | O(2)#2-Cs(1)-O(9)#3 | 56.64(12) |
| O(1)#1-Cs(1)-O(2) | 127.34(13) |                     |           |

---

Symmetry transformations used to generate equivalent atoms:

#1  $x-1/2, -y+3/2, -z+1$     #2  $-x+1/2, y+1/2, z$     #3  $-x, -y+1, -z+1$     #4  $-x, y+1/2, -z+1/2$

#5  $x+1/2, y, -z+1/2$     #6  $x, y+1, z$     #7  $x-1/2, y, -z+1/2$     #8  $x+1/2, -y+1/2, -z+1$

#9  $x+1/2, -y+3/2, -z+1$     #10  $-x, y-1/2, -z+1/2$     #11  $-x-1/2, y-1/2, z$

#12  $-x+1/2, y-1/2, z$     #13  $x, y-1, z$     #14  $-x-1/2, y+1/2, z$     #15  $x-1/2, -y+1/2, -z+1$

**Table S2c.** Selected bond distances (Å) and bond angles (deg.) for Rb<sub>6</sub>Mo<sub>2</sub>P<sub>4</sub>O<sub>19</sub>

|               |            |                     |            |
|---------------|------------|---------------------|------------|
| Mo(1)-Rb(2)#1 | 3.9994(9)  | O(1)#1-Rb(2)-O(2)#4 | 163.85(14) |
| Mo(1)-Rb(3)   | 4.2920(10) | O(1)#5-Rb(2)-O(2)#4 | 83.65(15)  |
| Mo(1)-Rb(1)#2 | 3.8408(10) | O(2)-Rb(2)-O(6)#5   | 79.96(16)  |
| Mo(1)-Rb(1)#1 | 3.9097(10) | O(2)-Rb(2)-O(10)#1  | 92.24(14)  |
| Mo(1)-Rb(1)#3 | 4.1732(10) | O(2)-Rb(2)-O(3)#4   | 81.12(16)  |
| Mo(1)-P(1)    | 2.8001(19) | O(2)-Rb(2)-O(3)#5   | 112.78(15) |
| Mo(1)-O(5)    | 2.228(5)   | O(2)-Rb(2)-O(9)#1   | 130.45(18) |
| Mo(1)-O(6)    | 2.247(5)   | O(2)-Rb(2)-O(1)#5   | 150.67(17) |
| Mo(1)-O(10)   | 2.023(5)   | O(2)-Rb(2)-O(1)#1   | 82.65(15)  |
| Mo(1)-O(9)    | 1.712(5)   | O(2)-Rb(2)-O(2)#4   | 112.37(13) |
| Mo(1)-O(7)    | 1.8568(6)  | O(5)#6-Rb(3)-O(5)#7 | 116.32(12) |
| Mo(1)-O(8)    | 1.694(6)   | O(5)#6-Rb(3)-O(4)#7 | 73.73(13)  |
| Rb(2)-P(2)#4  | 3.676(2)   | O(5)#7-Rb(3)-O(4)#7 | 48.84(12)  |
| Rb(2)-P(2)#5  | 3.750(2)   | O(5)#6-Rb(3)-O(4)#8 | 168.37(14) |
| Rb(2)-P(1)#5  | 3.6604(19) | O(5)#7-Rb(3)-O(6)#8 | 110.12(12) |
| Rb(2)-O(6)#5  | 3.132(5)   | O(5)#6-Rb(3)-O(6)#8 | 128.53(12) |
| Rb(2)-O(10)#1 | 3.212(6)   | O(5)#6-Rb(3)-O(2)#6 | 78.15(13)  |
| Rb(2)-O(3)#4  | 3.114(5)   | O(4)#8-Rb(3)-O(5)#7 | 74.33(13)  |
| Rb(2)-O(3)#5  | 3.270(5)   | O(4)#8-Rb(3)-O(4)#7 | 117.90(13) |
| Rb(2)-O(9)#1  | 2.962(5)   | O(4)#8-Rb(3)-O(6)#8 | 45.07(12)  |
| Rb(2)-O(1)#1  | 3.132(6)   | O(4)#7-Rb(3)-O(6)#8 | 129.26(13) |
| Rb(2)-O(1)#5  | 2.985(6)   | O(4)#8-Rb(3)-O(2)#6 | 90.22(14)  |
| Rb(2)-O(2)#4  | 3.323(6)   | O(9)-Rb(3)-O(5)#6   | 86.08(15)  |
| Rb(2)-O(2)    | 2.865(5)   | O(9)-Rb(3)-O(5)#7   | 78.08(14)  |
| Rb(3)-P(2)#6  | 3.7298(19) | O(9)-Rb(3)-O(4)#7   | 97.72(14)  |
| Rb(3)-P(1)#7  | 3.6128(18) | O(9)-Rb(3)-O(4)#8   | 91.98(16)  |
| Rb(3)-P(1)#6  | 3.941(2)   | O(9)-Rb(3)-O(6)#8   | 125.21(14) |
| Rb(3)-P(1)#8  | 3.756(2)   | O(9)-Rb(3)-O(2)#6   | 79.17(15)  |
| Rb(3)-O(5)#6  | 2.944(5)   | O(9)-Rb(3)-O(8)#9   | 163.67(15) |
| Rb(3)-O(5)#7  | 3.077(5)   | O(2)#6-Rb(3)-O(5)#7 | 151.90(14) |
| Rb(3)-O(4)#7  | 3.139(5)   | O(2)#6-Rb(3)-O(4)#7 | 151.86(14) |
| Rb(3)-O(4)#8  | 2.967(5)   | O(2)#6-Rb(3)-O(6)#8 | 70.83(13)  |
| Rb(3)-O(6)#8  | 3.570(5)   | O(8)#9-Rb(3)-O(5)#6 | 87.02(15)  |
| Rb(3)-O(9)    | 2.925(5)   | O(8)#9-Rb(3)-O(5)#7 | 91.81(14)  |
| Rb(3)-O(2)#6  | 3.048(6)   | O(8)#9-Rb(3)-O(4)#7 | 66.12(15)  |
| Rb(3)-O(8)#9  | 2.930(6)   | O(8)#9-Rb(3)-O(4)#8 | 97.65(16)  |
| Rb(1)-Mo(1)#2 | 3.8408(10) | O(8)#9-Rb(3)-O(6)#8 | 70.20(14)  |
| Rb(1)-Mo(1)#1 | 3.9097(10) | O(8)#9-Rb(3)-O(2)#6 | 113.78(16) |
| Rb(1)-P(2)#1  | 3.835(2)   | O(4)#4-Rb(1)-O(6)#2 | 147.54(15) |

---

|               |            |                       |            |
|---------------|------------|-----------------------|------------|
| Rb(1)-O(4)#4  | 2.769(5)   | O(4)#4-Rb(1)-O(10)#1  | 97.94(15)  |
| Rb(1)-O(6)#2  | 2.890(5)   | O(4)#4-Rb(1)-O(9)#2   | 91.83(15)  |
| Rb(1)-O(10)#1 | 2.954(5)   | O(4)#4-Rb(1)-O(7)#10  | 104.50(11) |
| Rb(1)-O(9)#2  | 3.121(6)   | O(4)#4-Rb(1)-O(2)#1   | 139.41(14) |
| Rb(1)-O(1)    | 2.759(6)   | O(4)#4-Rb(1)-O(8)#1   | 69.67(16)  |
| Rb(1)-O(7)#10 | 3.5547(8)  | O(4)#4-Rb(1)-O(8)#10  | 100.75(15) |
| Rb(1)-O(2)#1  | 3.547(6)   | O(6)#2-Rb(1)-O(10)#1  | 114.12(14) |
| Rb(1)-O(8)#10 | 3.301(6)   | O(6)#2-Rb(1)-O(9)#2   | 56.84(14)  |
| Rb(1)-O(8)#1  | 3.024(6)   | O(6)#2-Rb(1)-O(7)#10  | 49.25(10)  |
| P(2)-Rb(2)#1  | 3.774(2)   | O(6)#2-Rb(1)-O(2)#1   | 72.86(13)  |
| P(2)-Rb(2)#11 | 3.7499(19) | O(6)#2-Rb(1)-O(8)#1   | 125.08(15) |
| P(2)-Rb(2)#12 | 3.676(2)   | O(6)#2-Rb(1)-O(8)#10  | 74.79(14)  |
| P(2)-Rb(3)#13 | 3.7298(19) | O(10)#1-Rb(1)-O(9)#2  | 168.88(14) |
| P(2)-Rb(1)#1  | 3.835(2)   | O(10)#1-Rb(1)-O(7)#10 | 133.81(11) |
| P(2)-O(10)    | 1.553(5)   | O(10)#1-Rb(1)-O(2)#1  | 43.75(13)  |
| P(2)-O(3)     | 1.647(5)   | O(10)#1-Rb(1)-O(8)#1  | 54.23(14)  |
| P(2)-O(1)     | 1.477(6)   | O(10)#1-Rb(1)-O(8)#10 | 91.03(14)  |
| P(2)-O(2)     | 1.483(5)   | O(9)#2-Rb(1)-O(7)#10  | 47.18(9)   |
| P(1)-Rb(2)#11 | 3.6604(19) | O(9)#2-Rb(1)-O(2)#1   | 125.38(13) |
| P(1)-Rb(3)#7  | 3.6128(18) | O(9)#2-Rb(1)-O(8)#10  | 92.36(13)  |
| P(1)-Rb(3)#14 | 3.756(2)   | O(1)-Rb(1)-O(4)#4     | 99.47(17)  |
| P(1)-O(5)     | 1.535(5)   | O(1)-Rb(1)-O(6)#2     | 82.85(16)  |
| P(1)-O(4)     | 1.480(5)   | O(1)-Rb(1)-O(10)#1    | 95.86(15)  |
| P(1)-O(6)     | 1.537(5)   | O(1)-Rb(1)-O(9)#2     | 77.21(15)  |
| P(1)-O(3)     | 1.612(5)   | O(1)-Rb(1)-O(7)#10    | 118.95(12) |
| O(5)-Rb(3)#7  | 3.077(5)   | O(1)-Rb(1)-O(2)#1     | 76.79(15)  |
| O(5)-Rb(3)#13 | 2.944(5)   | O(1)-Rb(1)-O(8)#1     | 144.03(17) |
| O(4)-Rb(3)#7  | 3.139(5)   | O(1)-Rb(1)-O(8)#10    | 157.50(17) |
| O(4)-Rb(3)#14 | 2.967(5)   | O(2)#1-Rb(1)-O(7)#10  | 112.64(10) |
| O(4)-Rb(1)#12 | 2.769(5)   | O(8)#1-Rb(1)-O(9)#2   | 135.26(14) |
| O(6)-Rb(2)#11 | 3.132(5)   | O(8)#10-Rb(1)-O(7)#10 | 45.66(10)  |
| O(6)-Rb(3)#14 | 3.570(5)   | O(8)#1-Rb(1)-O(7)#10  | 97.01(11)  |
| O(6)-Rb(1)#2  | 2.890(5)   | O(8)#10-Rb(1)-O(2)#1  | 93.93(14)  |
| O(10)-Rb(2)#1 | 3.212(6)   | O(8)#1-Rb(1)-O(2)#1   | 89.63(14)  |
| O(10)-Rb(1)#1 | 2.954(5)   | O(8)#1-Rb(1)-O(8)#10  | 54.48(19)  |
| O(3)-Rb(2)#12 | 3.114(5)   | O(10)-P(2)-O(3)       | 104.7(3)   |
| O(3)-Rb(2)#11 | 3.270(5)   | O(1)-P(2)-O(10)       | 110.4(3)   |
| O(9)-Rb(2)#1  | 2.962(5)   | O(1)-P(2)-O(3)        | 106.0(3)   |
| O(9)-Rb(1)#2  | 3.121(6)   | O(1)-P(2)-O(2)        | 119.3(4)   |
| O(1)-Rb(2)#11 | 2.985(6)   | O(2)-P(2)-O(10)       | 109.8(3)   |
| O(1)-Rb(2)#1  | 3.132(6)   | O(2)-P(2)-O(3)        | 105.6(3)   |

---

|                      |            |                      |            |
|----------------------|------------|----------------------|------------|
| O(7)-Mo(1)#7         | 1.8568(6)  | O(9)#1-Rb(2)-O(6)#5  | 144.80(15) |
| O(7)-Rb(1)#3         | 3.5547(8)  | O(9)#1-Rb(2)-O(10)#1 | 52.85(13)  |
| O(7)-Rb(1)#2         | 3.5547(8)  | O(9)#1-Rb(2)-O(3)#4  | 70.30(14)  |
| O(2)-Rb(2)#12        | 3.323(6)   | O(9)#1-Rb(2)-O(3)#5  | 115.73(14) |
| O(2)-Rb(3)#13        | 3.048(6)   | O(9)#1-Rb(2)-O(1)#5  | 76.44(16)  |
| O(2)-Rb(1)#1         | 3.547(6)   | O(9)#1-Rb(2)-O(1)#1  | 91.54(14)  |
| O(8)-Rb(3)#15        | 2.930(6)   | O(9)#1-Rb(2)-O(2)#4  | 74.34(15)  |
| O(8)-Rb(1)#1         | 3.024(6)   | O(1)#5-Rb(2)-O(6)#5  | 70.95(14)  |
| O(8)-Rb(1)#3         | 3.301(6)   | O(1)#1-Rb(2)-O(6)#5  | 73.29(13)  |
| O(5)-Mo(1)-O(6)      | 65.32(17)  | O(1)#5-Rb(2)-O(10)#1 | 98.67(14)  |
| O(10)-Mo(1)-O(5)     | 79.6(2)    | O(1)#1-Rb(2)-O(10)#1 | 46.18(13)  |
| O(10)-Mo(1)-O(6)     | 80.53(19)  | O(1)#5-Rb(2)-O(3)#4  | 124.44(15) |
| O(9)-Mo(1)-O(5)      | 157.0(2)   | O(1)#5-Rb(2)-O(3)#5  | 46.78(13)  |
| O(9)-Mo(1)-O(6)      | 91.8(2)    | O(1)#1-Rb(2)-O(3)#5  | 108.16(13) |
| O(9)-Mo(1)-O(10)     | 94.7(2)    | O(1)#5-Rb(2)-O(1)#1  | 85.47(17)  |
| O(9)-Mo(1)-O(7)      | 98.27(19)  | O(5)-P(1)-O(6)       | 103.7(3)   |
| O(7)-Mo(1)-O(5)      | 82.40(13)  | O(5)-P(1)-O(3)       | 105.2(3)   |
| O(7)-Mo(1)-O(6)      | 83.65(13)  | O(4)-P(1)-O(5)       | 117.0(3)   |
| O(7)-Mo(1)-O(10)     | 159.77(14) | O(4)-P(1)-O(6)       | 116.5(3)   |
| O(8)-Mo(1)-O(5)      | 97.0(2)    | O(4)-P(1)-O(3)       | 108.9(3)   |
| O(8)-Mo(1)-O(6)      | 162.1(2)   | O(6)-P(1)-O(3)       | 104.3(3)   |
| O(8)-Mo(1)-O(10)     | 93.9(2)    | O(3)#4-Rb(2)-O(6)#5  | 140.87(13) |
| O(8)-Mo(1)-O(9)      | 105.6(3)   | O(3)#4-Rb(2)-O(10)#1 | 95.19(13)  |
| O(8)-Mo(1)-O(7)      | 97.4(2)    | O(3)#4-Rb(2)-O(3)#5  | 114.72(9)  |
| O(6)#5-Rb(2)-O(10)#1 | 119.44(13) | O(3)#4-Rb(2)-O(1)#1  | 137.12(14) |
| O(6)#5-Rb(2)-O(3)#5  | 45.66(12)  | O(3)#4-Rb(2)-O(2)#4  | 45.46(13)  |
| O(6)#5-Rb(2)-O(2)#4  | 113.96(13) | O(3)#5-Rb(2)-O(2)#4  | 72.37(13)  |
| O(10)#1-Rb(2)-O(3)#5 | 142.92(12) | O(10)#1-Rb(2)-O(2)#4 | 124.15(14) |

Symmetry transformations used to generate equivalent atoms:

#1+3    #2+3    #3+2    #4 x+1,y,z+1    #5 1    #6 -x,y+3/2,-z+1/2    #7+4  
#8 -x,y+1/2,-z+1/2    #9 x+2,y-1,z    #10+0    #11 1    #12 x+1,y-1,z+1  
#13 -x,y+3/2,-z+3/2    #14 -x,y+1/2,-z+3/2    #15 x+2,y,z

**Table S2d.** Selected bond distances (Å) and bond angles (deg) for Cs<sub>6</sub>Mo<sub>2</sub>P<sub>4</sub>O<sub>19</sub>.

|               |            |                       |            |
|---------------|------------|-----------------------|------------|
| Cs(1)-P(1)    | 3.8234(11) | O(7)-Mo(1)-O(2)#1     | 161.16(8)  |
| Cs(1)-P(2)    | 3.8338(12) | O(7)-Mo(1)-O(3)#7     | 84.03(7)   |
| Cs(1)-P(2)#1  | 3.9127(12) | O(7)-Mo(1)-O(9)#7     | 83.44(7)   |
| Cs(1)-O(2)#1  | 3.354(3)   | O(9)#7-Mo(1)-O(3)#7   | 65.59(10)  |
| Cs(1)-O(3)    | 3.311(3)   | O(1)-P(1)-O(3)        | 116.52(17) |
| Cs(1)-O(4)    | 3.122(3)   | O(1)-P(1)-O(5)        | 108.51(17) |
| Cs(1)-O(5)    | 3.454(3)   | O(1)-P(1)-O(9)        | 116.82(17) |
| Cs(1)-O(5)#2  | 3.248(3)   | O(3)-P(1)-O(5)        | 105.33(16) |
| Cs(1)-O(8)#2  | 3.061(3)   | O(9)-P(1)-O(3)        | 103.22(16) |
| Cs(1)-O(8)    | 3.491(3)   | O(9)-P(1)-O(5)        | 105.34(15) |
| Cs(1)-O(10)#3 | 3.142(3)   | O(2)-P(2)-O(5)#2      | 103.88(15) |
| Cs(1)-O(10)#1 | 3.267(3)   | O(8)-P(2)-O(2)        | 110.17(19) |
| Cs(2)-Mo(1)#3 | 4.0984(5)  | O(8)-P(2)-O(5)#2      | 105.55(17) |
| Cs(2)-Mo(1)#2 | 4.0235(5)  | O(8)-P(2)-O(10)       | 118.82(19) |
| Cs(2)-P(2)#4  | 3.9436(12) | O(10)-P(2)-O(2)       | 110.70(19) |
| Cs(2)-O(1)    | 2.957(3)   | O(10)-P(2)-O(5)#2     | 106.46(18) |
| Cs(2)-O(2)#4  | 3.120(3)   | O(1)#5-Cs(3)-O(1)#10  | 116.55(7)  |
| Cs(2)-O(3)#5  | 3.081(3)   | O(1)#5-Cs(3)-O(3)#5   | 42.94(7)   |
| Cs(2)-O(4)#2  | 3.300(3)   | O(1)#10-Cs(3)-O(3)#5  | 129.02(7)  |
| Cs(2)-O(6)#6  | 3.393(3)   | O(1)#5-Cs(3)-O(5)#11  | 128.46(7)  |
| Cs(2)-O(6)#3  | 3.166(3)   | O(1)#10-Cs(3)-O(5)#11 | 111.59(7)  |
| Cs(2)-O(7)#2  | 3.7254(4)  | O(1)#5-Cs(3)-O(8)#4   | 92.71(8)   |
| Cs(2)-O(8)#4  | 3.600(3)   | O(1)#5-Cs(3)-O(9)#10  | 75.52(7)   |
| Cs(2)-O(10)   | 2.943(3)   | O(3)#5-Cs(3)-O(5)#11  | 112.99(6)  |
| Mo(1)-P(1)#7  | 2.7955(12) | O(4)#4-Cs(3)-O(1)#5   | 94.06(8)   |
| Mo(1)-Cs(3)#8 | 4.4425(8)  | O(4)#4-Cs(3)-O(1)#10  | 93.71(8)   |
| Mo(1)-O(2)#1  | 2.029(3)   | O(4)#4-Cs(3)-O(3)#5   | 127.01(7)  |
| Mo(1)-O(3)#7  | 2.232(3)   | O(4)#4-Cs(3)-O(5)#11  | 65.02(7)   |
| Mo(1)-O(4)    | 1.716(3)   | O(4)#4-Cs(3)-O(8)#4   | 82.24(8)   |
| Mo(1)-O(6)    | 1.700(3)   | O(4)#4-Cs(3)-O(9)#10  | 74.41(8)   |
| Mo(1)-O(7)    | 1.8697(3)  | O(6)#6-Cs(3)-O(1)#10  | 69.95(8)   |
| Mo(1)-O(9)#7  | 2.231(3)   | O(6)#6-Cs(3)-O(1)#5   | 95.14(8)   |
| P(1)-Cs(3)#1  | 3.9396(11) | O(6)#6-Cs(3)-O(3)#5   | 68.03(7)   |
| P(1)-Cs(3)#9  | 4.0978(11) | O(6)#6-Cs(3)-O(4)#4   | 163.54(8)  |
| P(1)-Cs(3)#10 | 3.7533(12) | O(6)#6-Cs(3)-O(5)#11  | 118.19(7)  |
| P(1)-O(1)     | 1.482(3)   | O(6)#6-Cs(3)-O(8)#4   | 110.88(9)  |
| P(1)-O(3)     | 1.543(3)   | O(6)#6-Cs(3)-O(9)#10  | 94.75(8)   |
| P(1)-O(5)     | 1.613(3)   | O(6)#6-Cs(3)-O(9)#11  | 87.77(8)   |
| P(1)-O(9)     | 1.541(3)   | O(8)#4-Cs(3)-O(1)#10  | 150.71(8)  |

|                      |            |                       |           |
|----------------------|------------|-----------------------|-----------|
| P(2)-Cs(3)#4         | 3.8743(12) | O(8)#4-Cs(3)-O(3)#5   | 73.23(7)  |
| P(2)-O(2)            | 1.555(3)   | O(8)#4-Cs(3)-O(5)#11  | 40.73(7)  |
| P(2)-O(5)#2          | 1.657(3)   | O(8)#4-Cs(3)-O(9)#10  | 152.80(8) |
| P(2)-O(8)            | 1.478(3)   | O(9)#10-Cs(3)-O(1)#10 | 46.94(7)  |
| P(2)-O(10)           | 1.484(3)   | O(9)#11-Cs(3)-O(1)#10 | 75.93(7)  |
| Cs(3)-O(1)#5         | 3.145(3)   | O(9)#11-Cs(3)-O(1)#5  | 167.44(8) |
| Cs(3)-O(1)#10        | 3.234(3)   | O(9)#10-Cs(3)-O(3)#5  | 110.18(6) |
| Cs(3)-O(3)#5         | 3.727(3)   | O(9)#11-Cs(3)-O(3)#5  | 128.77(7) |
| Cs(3)-O(4)#4         | 3.114(3)   | O(9)#11-Cs(3)-O(4)#4  | 86.19(8)  |
| Cs(3)-O(5)#11        | 3.809(3)   | O(9)#11-Cs(3)-O(5)#11 | 40.97(6)  |
| Cs(3)-O(6)#6         | 3.085(3)   | O(9)#10-Cs(3)-O(5)#11 | 132.86(6) |
| Cs(3)-O(8)#4         | 3.147(3)   | O(9)#11-Cs(3)-O(8)#4  | 74.86(7)  |
| Cs(3)-O(9)#10        | 3.233(3)   | O(9)#11-Cs(3)-O(9)#10 | 116.49(6) |
| Cs(3)-O(9)#11        | 3.114(3)   | O(1)-Cs(2)-O(2)#4     | 97.03(8)  |
| O(2)#1-Cs(1)-O(5)    | 138.92(7)  | O(1)-Cs(2)-O(3)#5     | 146.75(8) |
| O(2)#1-Cs(1)-O(8)    | 123.69(7)  | O(1)-Cs(2)-O(4)#2     | 93.95(8)  |
| O(3)-Cs(1)-O(2)#1    | 118.96(7)  | O(1)-Cs(2)-O(6)#3     | 72.50(9)  |
| O(3)-Cs(1)-O(5)      | 43.48(7)   | O(1)-Cs(2)-O(6)#6     | 101.62(8) |
| O(3)-Cs(1)-O(8)      | 113.90(7)  | O(1)-Cs(2)-O(7)#2     | 106.26(6) |
| O(4)-Cs(1)-O(2)#1    | 49.82(7)   | O(1)-Cs(2)-O(8)#4     | 137.29(7) |
| O(4)-Cs(1)-O(3)      | 141.68(8)  | O(2)#4-Cs(2)-O(4)#2   | 168.70(8) |
| O(4)-Cs(1)-O(5)      | 115.59(8)  | O(2)#4-Cs(2)-O(6)#3   | 50.94(8)  |
| O(4)-Cs(1)-O(5)#2    | 72.47(8)   | O(2)#4-Cs(2)-O(6)#6   | 91.62(7)  |
| O(4)-Cs(1)-O(8)      | 76.81(8)   | O(2)#4-Cs(2)-O(7)#2   | 132.86(6) |
| O(4)-Cs(1)-O(10)#1   | 86.96(8)   | O(2)#4-Cs(2)-O(8)#4   | 42.71(7)  |
| O(4)-Cs(1)-O(10)#3   | 77.07(8)   | O(3)#5-Cs(2)-O(2)#4   | 115.62(8) |
| O(5)#2-Cs(1)-O(2)#1  | 97.08(7)   | O(3)#5-Cs(2)-O(4)#2   | 53.85(7)  |
| O(5)#2-Cs(1)-O(3)    | 141.24(7)  | O(3)#5-Cs(2)-O(6)#6   | 72.74(8)  |
| O(5)#2-Cs(1)-O(5)    | 115.60(5)  | O(3)#5-Cs(2)-O(6)#3   | 122.99(8) |
| O(5)#2-Cs(1)-O(8)    | 43.34(7)   | O(3)#5-Cs(2)-O(7)#2   | 46.63(5)  |
| O(5)-Cs(1)-O(8)      | 74.80(7)   | O(3)#5-Cs(2)-O(8)#4   | 75.84(7)  |
| O(5)#2-Cs(1)-O(10)#1 | 137.83(7)  | O(4)#2-Cs(2)-O(6)#6   | 88.76(7)  |
| O(8)#2-Cs(1)-O(2)#1  | 93.17(7)   | O(4)#2-Cs(2)-O(7)#2   | 44.99(5)  |
| O(8)#2-Cs(1)-O(3)    | 80.61(8)   | O(4)#2-Cs(2)-O(8)#4   | 126.01(7) |
| O(8)#2-Cs(1)-O(4)    | 130.78(8)  | O(6)#3-Cs(2)-O(4)#2   | 136.19(8) |
| O(8)#2-Cs(1)-O(5)#2  | 83.86(8)   | O(6)#3-Cs(2)-O(6)#6   | 55.55(10) |
| O(8)#2-Cs(1)-O(5)    | 113.51(8)  | O(6)#3-Cs(2)-O(7)#2   | 97.93(6)  |
| O(8)#2-Cs(1)-O(8)    | 113.61(7)  | O(6)#6-Cs(2)-O(7)#2   | 44.28(5)  |
| O(8)#2-Cs(1)-O(10)#3 | 147.69(9)  | O(6)#3-Cs(2)-O(8)#4   | 85.18(7)  |
| O(8)#2-Cs(1)-O(10)#1 | 82.62(8)   | O(6)#6-Cs(2)-O(8)#4   | 94.41(7)  |
| O(10)#1-Cs(1)-O(2)#1 | 44.34(7)   | O(8)#4-Cs(2)-O(7)#2   | 112.67(5) |

|                       |            |                     |            |
|-----------------------|------------|---------------------|------------|
| O(10)#3-Cs(1)-O(2)#1  | 96.73(7)   | O(10)-Cs(2)-O(1)    | 98.99(9)   |
| O(10)#3-Cs(1)-O(3)    | 67.68(7)   | O(10)-Cs(2)-O(2)#4  | 98.44(8)   |
| O(10)#1-Cs(1)-O(3)    | 74.75(7)   | O(10)-Cs(2)-O(3)#5  | 83.01(8)   |
| O(10)#3-Cs(1)-O(5)#2  | 124.98(8)  | O(10)-Cs(2)-O(4)#2  | 77.14(8)   |
| O(10)#3-Cs(1)-O(5)    | 44.58(7)   | O(10)-Cs(2)-O(6)#3  | 144.91(9)  |
| O(10)#1-Cs(1)-O(5)    | 106.43(7)  | O(10)-Cs(2)-O(6)#6  | 155.74(9)  |
| O(10)#1-Cs(1)-O(8)    | 162.14(8)  | O(10)-Cs(2)-O(7)#2  | 117.01(6)  |
| O(10)#3-Cs(1)-O(8)    | 85.90(8)   | O(10)-Cs(2)-O(8)#4  | 78.73(8)   |
| O(10)#3-Cs(1)-O(10)#1 | 83.23(9)   | O(2)#1-Mo(1)-O(3)#7 | 80.68(11)  |
| O(6)-Mo(1)-O(2)#1     | 92.53(14)  | O(2)#1-Mo(1)-O(9)#7 | 80.26(11)  |
| O(6)-Mo(1)-O(3)#7     | 159.96(13) | O(4)-Mo(1)-O(2)#1   | 93.46(14)  |
| O(6)-Mo(1)-O(4)       | 105.80(16) | O(4)-Mo(1)-O(3)#7   | 93.47(13)  |
| O(6)-Mo(1)-O(7)       | 98.21(11)  | O(4)-Mo(1)-O(7)     | 98.41(11)  |
| O(6)-Mo(1)-O(9)#7     | 94.77(14)  | O(4)-Mo(1)-O(9)#7   | 158.78(13) |

Symmetry transformations used to generate equivalent atoms:

|                       |                          |                          |                         |
|-----------------------|--------------------------|--------------------------|-------------------------|
| #1 $x, -y+1/2, z+1/2$ | #2 $-x+1, y+1/2, -z+3/2$ | #3 $-x+1, y-1/2, -z+3/2$ | #4 $-x+1, -y, -z+1$     |
| #5 $x, -y+1/2, z-1/2$ | #6 $x+1, -y+1/2, z-1/2$  | #7 $-x+1, -y, -z+2$      | #8 $x-1, -y+1/2, z+1/2$ |
| #9 $x, -y-1/2, z+1/2$ | #10 $-x+2, -y, -z+1$     | #11 $x, -y-1/2, z-1/2$   | #12 $-x, -y, -z+2$      |



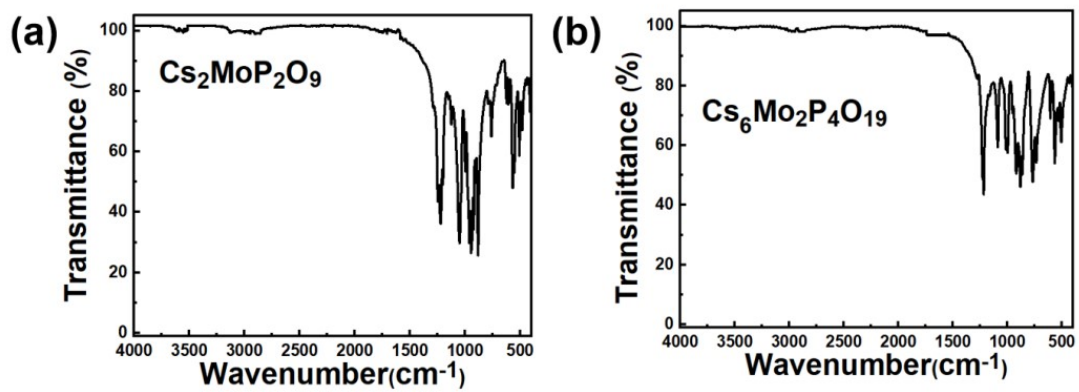

Figure S1. IR spectra of  $\text{Cs}_2\text{MoP}_2\text{O}_9$  and  $\text{Cs}_6\text{Mo}_2\text{P}_4\text{O}_{19}$

**Table S3.** Assignment of the absorption bands observed in the IR spectra for Cs<sub>2</sub>MoP<sub>2</sub>O<sub>9</sub> and Cs<sub>6</sub>Mo<sub>2</sub>P<sub>4</sub>O<sub>19</sub>.

| Assignment                   | Cs <sub>2</sub> MoP <sub>2</sub> O <sub>9</sub> | Cs <sub>6</sub> Mo <sub>2</sub> P <sub>4</sub> O <sub>19</sub> |
|------------------------------|-------------------------------------------------|----------------------------------------------------------------|
| $\nu_{\text{as}}$ (O-P-O)    | 1247, 1219                                      | 1219                                                           |
| $\nu_{\text{s}}$ (O-P-O)     | 1125, 1049                                      | 1087, 1016                                                     |
| $\nu_{\text{as}}$ (P-O-P)    | 1002, 964, 945                                  | 997, 917                                                       |
| $\nu_{\text{s}}$ (P-O-P)     | 761, 624, 605                                   | 770, 737                                                       |
| $\delta_{\text{as}}$ (O-P-O) | 605, 567                                        | 605, 563, 525                                                  |
| $\delta_{\text{s}}$ (O-P-O)  | 506, 482                                        | 506, 435                                                       |
| Mo–O vibration               | 879                                             | 883                                                            |

**Table S4.** The anhydrous compounds of A-Mo-P-O (A:Rb, Cs) system, space group, Mo-P-O framework configuration, P-O framework configuration and A/P ratio.

| Serial number | compounds                                                                                      | Space group (No.)                            | Mo-P-O framework | P-O framework                                                 | A/P (A = Cs, Rb) |
|---------------|------------------------------------------------------------------------------------------------|----------------------------------------------|------------------|---------------------------------------------------------------|------------------|
| 1             | CsMo <sub>4</sub> P <sub>7</sub> O <sub>28</sub> <sup>1</sup>                                  | <i>P1</i> (2)                                | 3d structure     | P <sub>3</sub> O <sub>10</sub> ,P <sub>2</sub> O <sub>7</sub> | 1:7 (0.14)       |
| 2             | Cs <sub>4</sub> Mo <sub>10</sub> P <sub>18</sub> O <sub>66</sub> <sup>2</sup>                  | <i>P1</i> (2)                                | 3d structure     | P <sub>3</sub> O <sub>10</sub> ,P <sub>2</sub> O <sub>7</sub> | 2:9 (0.22)       |
| 3             | RbMoPO <sub>6</sub> <sup>3</sup>                                                               | <i>Fddd</i> (70)                             | 3d structure     | Isolated PO <sub>4</sub>                                      | 1:4 (0.25)       |
| 4             | CsMo <sub>8</sub> P <sub>4</sub> O <sub>33</sub> <sup>4</sup>                                  | <i>I</i> $\bar{4}$ 2 <i>d</i> (122)          | 3d structure     | Isolated PO <sub>4</sub>                                      | 1:4 (0.25)       |
| 5             | Rb <sub>3</sub> Mo <sub>12</sub> PO <sub>40</sub> <sup>5</sup>                                 | <i>Pn</i> $\bar{3}$ <i>m</i> (224)           | 0 d structure    | Isolated PO <sub>4</sub>                                      | 1:4 (0.25)       |
| 6             | Cs <sub>3</sub> (Mo <sub>6</sub> P <sub>10</sub> O <sub>38</sub> ) <sup>6</sup>                | <i>P1</i> (2)                                | 3d structure     | PO <sub>4</sub> ,P <sub>2</sub> O <sub>7</sub> coexistence    | 3:10 (0.3)       |
| 7             | RbMo <sub>2</sub> P <sub>3</sub> O <sub>12</sub> <sup>7</sup>                                  | <i>Pbcm</i> (57)                             | 3d structure     | PO <sub>4</sub> ,P <sub>2</sub> O <sub>7</sub> coexistence    | 1:3 (0.33)       |
| 8             | Rb <sub>4</sub> Mo <sub>8</sub> P <sub>12</sub> O <sub>52</sub> <sup>8</sup>                   | <i>P2</i> <sub>1</sub> (4)                   | 3d structure     | PO <sub>4</sub> ,P <sub>2</sub> O <sub>7</sub> coexistence    | 1:3 (0.33)       |
| 9             | Cs <sub>2</sub> Mo <sub>4</sub> P <sub>6</sub> O <sub>26</sub> <sup>9</sup>                    | <i>P2</i> / <i>c</i> (13)                    | 1d chain         | PO <sub>4</sub> ,P <sub>2</sub> O <sub>7</sub> coexistence    | 1:3 (0.33)       |
| 10            | Cs <sub>4</sub> Mo <sub>8</sub> P <sub>12</sub> O <sub>52</sub> <sup>9</sup>                   | <i>P2</i> <sub>1</sub> (4)                   | 3d structure     | PO <sub>4</sub> ,P <sub>2</sub> O <sub>7</sub> coexistence    | 1:3 (0.33)       |
| 11            | Cs <sub>3</sub> Mo <sub>8</sub> P <sub>8</sub> O <sub>43</sub> <sup>10</sup>                   | <i>C2</i> / <i>m</i> (12)                    | 3d structure     | Isolated PO <sub>4</sub>                                      | 3:8 (0.38)       |
| 12            | Cs <sub>4</sub> Mo <sub>6</sub> P <sub>10</sub> O <sub>38</sub> <sup>11</sup>                  | <i>P2</i> <sub>1</sub> / <i>m</i> (11)       | 3d structure     | PO <sub>4</sub> ,P <sub>2</sub> O <sub>7</sub> coexistence    | 2:5 (0.4)        |
| 13            | Cs <sub>3</sub> (Mo <sub>5</sub> P <sub>7</sub> O <sub>24</sub> ) <sup>12</sup>                | <i>P31c</i> (159)                            | 3d structure     | PO <sub>4</sub> ,P <sub>2</sub> O <sub>7</sub> coexistence    | 3:7 (0.43)       |
| 14            | CsMoP <sub>2</sub> O <sub>7</sub> <sup>13</sup>                                                | <i>P2</i> <sub>1</sub> / <i>c</i> (14)       | 3d structure     | Isolated P <sub>2</sub> O <sub>7</sub>                        | 1:2 (0.5)        |
| 15            | Cs(MoO)(P <sub>2</sub> O <sub>7</sub> ) <sup>14</sup>                                          | <i>P2</i> <sub>1</sub> / <i>c</i> (14)       | 3d structure     | Isolated P <sub>2</sub> O <sub>7</sub>                        | 1:2 (0.5)        |
| 16            | Cs(Mo <sub>2</sub> P <sub>2</sub> O <sub>10</sub> ) <sup>15</sup>                              | <i>P2</i> <sub>1</sub> / <i>c</i> (14)       | 3d structure     | Isolated PO <sub>4</sub>                                      | 1:2 (0.5)        |
| 17            | CsMo <sub>2</sub> P <sub>3</sub> O <sub>13</sub> <sup>16</sup>                                 | <i>P1</i> (2)                                | 3d structure     | PO <sub>4</sub> ,P <sub>2</sub> O <sub>7</sub> coexistence    | 1:2 (0.5)        |
| 18            | Cs(Mo <sub>2</sub> O <sub>3</sub> (PO <sub>4</sub> ) <sub>2</sub> ) <sup>17</sup>              | <i>P2</i> <sub>1</sub> / <i>c</i> (14)       | 1d chain         | Isolated PO <sub>4</sub>                                      | 1:2 (0.5)        |
| 19            | Cs <sub>3</sub> Mo <sub>5</sub> P <sub>6</sub> O <sub>25</sub> <sup>18</sup>                   | <i>P31c</i> (159)                            | 3d structure     | Isolated P <sub>2</sub> O <sub>7</sub>                        | 1:2 (0.5)        |
| 20            | Cs <sub>3</sub> (Mo <sub>4</sub> P <sub>4</sub> O <sub>22</sub> ) <sup>19</sup>                | <i>P2</i> <sub>1</sub> / <i>c</i> (14)       | 3d structure     | Isolated PO <sub>4</sub>                                      | 3:4 (0.75)       |
| 21            | Rb <sub>3</sub> Mo <sub>4</sub> P <sub>4</sub> O <sub>22</sub> <sup>20</sup>                   | <i>C222</i> <sub>1</sub> (20)                | 3d structure     | Isolated PO <sub>4</sub>                                      | 3:4 (0.75)       |
| 22            | Rb <sub>3</sub> Mo <sub>4</sub> P <sub>4</sub> O <sub>22</sub> <sup>21</sup>                   | <i>P4</i> <sub>3</sub> 2 <sub>1</sub> 2 (96) | 3d structure     | Isolated PO <sub>4</sub>                                      | 3:4 (0.75)       |
| 23            | RbMo(P <sub>2</sub> O <sub>7</sub> ) <sup>22</sup>                                             | <i>P2</i> <sub>1</sub> / <i>c</i> (14)       | 3d structure     | Isolated P <sub>2</sub> O <sub>7</sub>                        | 1:1 (1.0)        |
| 24            | Rb <sub>2</sub> Mo <sub>2</sub> P <sub>2</sub> O <sub>11</sub> <sup>23</sup>                   | <i>P2</i> <sub>1</sub> / <i>c</i> (14)       | 3d structure     | Isolated PO <sub>4</sub>                                      | 1:1 (1.0)        |
| 25            | Cs(MoO <sub>2</sub> (PO <sub>4</sub> )) <sup>24</sup>                                          | <i>Fddd</i> (70)                             | 3d structure     | Isolated PO <sub>4</sub>                                      | 1:1 (1.0)        |
| 26            | Cs <sub>3</sub> (Mo <sub>4</sub> O <sub>4</sub> )(PO <sub>4</sub> ) <sub>3</sub> <sup>25</sup> | <i>P</i> $\bar{4}$ 3 <i>m</i> (215)          | 3d structure     | Isolated PO <sub>4</sub>                                      | 1:1 (1.0)        |
| 27            | Rb <sub>4</sub> Mo <sub>5</sub> P <sub>2</sub> O <sub>22</sub> <sup>3</sup>                    | <i>C222</i> <sub>1</sub> (20)                | 0 d structure    | Isolated P <sub>2</sub> O <sub>7</sub>                        | 2:1 (2.0)        |
| 28            | Cs <sub>4</sub> Mo <sub>5</sub> P <sub>2</sub> O <sub>22</sub> <sup>26</sup>                   | <i>C222</i> <sub>1</sub>                     | 1d chain         | Isolated PO <sub>4</sub>                                      | 2:1 (2.0)        |
| 29            | Cs <sub>3</sub> Mo <sub>12</sub> PO <sub>40</sub> <sup>27</sup>                                | <i>Pn</i> $\bar{3}$ <i>m</i> (224)           | 0 d structure    | Isolated PO <sub>4</sub>                                      | 3:1 (3.0)        |

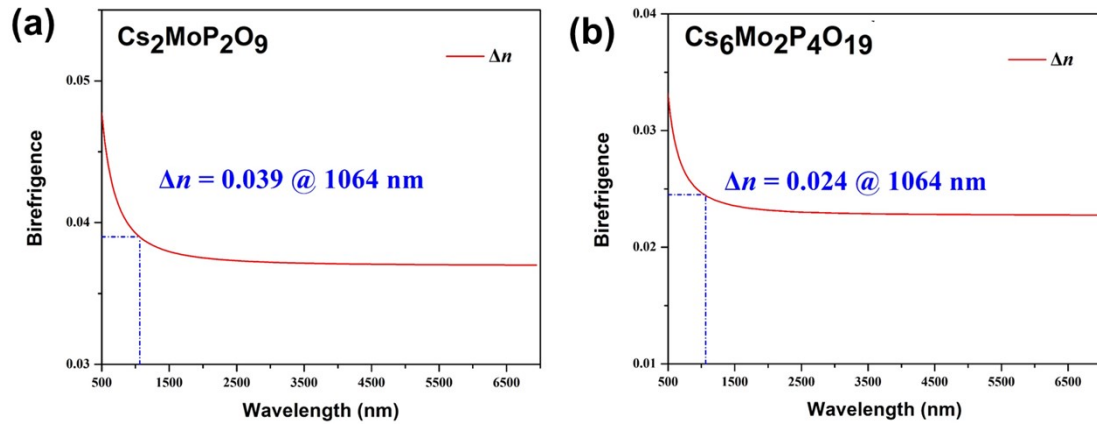

**Figure S2.** The calculated frequency-dependent birefringence of  $\text{Cs}_2\text{MoP}_2\text{O}_9$  and  $\text{Cs}_6\text{Mo}_2\text{P}_4\text{O}_{19}$ .

## Thermal behavior analysis

Thermal gravimetric analysis (TGA) and differential scanning calorimetry (DSC) were carried out with NETZSCH STA 449F3 simultaneous thermal analyzer instrument. The sample and reference ( $\text{Al}_2\text{O}_3$ ) were enclosed in Pt crucibles, and heated from 40 to 900 °C at a heating rate of 5 °C/min under a nitrogen atmosphere.

As shown in Figure S3, there is only one big endothermic (exothermic) peak on the heating (cooling) curve at 626 °C (548 °C) for  $\text{Cs}_2\text{MoP}_2\text{O}_9$ , and 545 °C (432 °C) for  $\text{Cs}_6\text{Mo}_2\text{P}_4\text{O}_{19}$ , respectively. Remarkably, the XRD patterns for the residuals of  $\text{Cs}_2\text{MoP}_2\text{O}_9$  after TG-DTA are distinct from that before melting. The decomposition products include  $\text{Cs}_2\text{MoP}_2\text{O}_9$ ,  $\text{Cs}_2\text{Mo}_4\text{O}_{13}$ ,  $\text{Cs}_4\text{P}_2\text{O}_7$ ,  $\text{Mo}_2\text{P}_2\text{O}_{11}$ ,  $\text{Cs}_2\text{Mo}_5\text{O}_{16}$  and  $\text{MoO}_3$  phase (PDF Card no. 39-0076, 53-0031, 38-0001, 15-0610, 28-0320 and 47-1320, respectively). For  $\text{Cs}_6\text{Mo}_2\text{P}_4\text{O}_{19}$ , XRD pattern after melting is consistent with before melting.

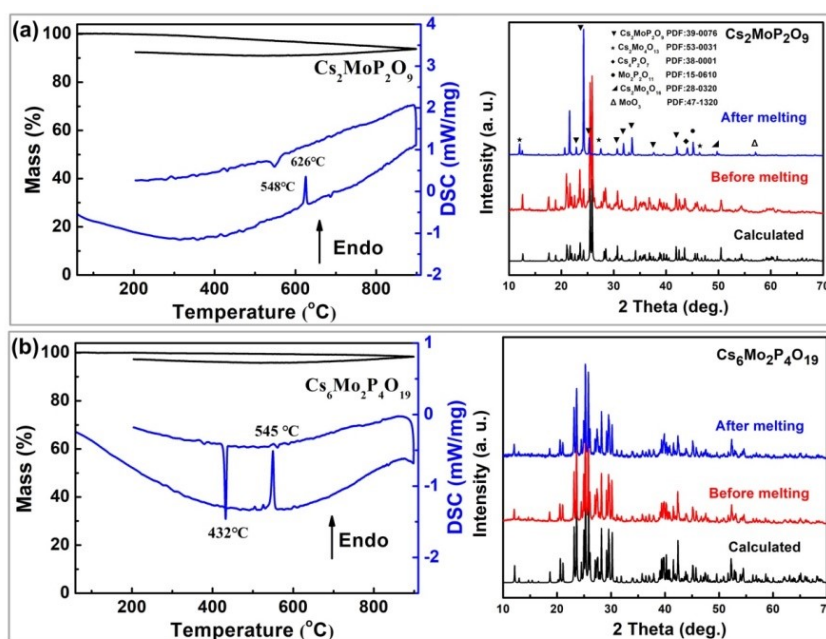

Figure S3 TGA - DSC curves and PXRD patterns of calculated, before melting and after melting for (a)  $\text{Cs}_2\text{MoP}_2\text{O}_9$ , (b)  $\text{Cs}_6\text{Mo}_2\text{P}_4\text{O}_{19}$

## Reference

1. A. Leclaire, B. Raveau, *J. Solid. State. Chem.*, 2006, **179**(8), 2433.
2. R. C. Haushalter and F. W. Lai, *J. Solid. State. Chem.*, 1988, **76**, 218.
3. Y. Wang, S. L. Pan, X. Su, Z. H. Yang, L. Y. Dong and M. Zhang, *Inorg. Chem.*, 2013, **52**(3), 1488.
4. T. Hoareau, A. Leclaire, M. M. Borel, J. Provost, and B. Raveau, *J. Solid. State. Chem.*, 1997, **128**(2), 233.
5. P. Armand, D. Granier and A. van der Lee, *Acta Crystallogr.*, 2007, **E63**, i191.
6. K.H.Lii, C.C.Wang, *J. Solid. State. Chem.*, 1988, **77**(1), 117.
7. A. Leclaire and B. Raveau, *Acta. Crystallogr.*, 1988, **C44**, 226.
8. D. Riou and M. Goreaud, *J. Solid. State. Chem.*, 1989, **79**, 99.
9. K. H. Lii and R. C. Haushalter, *J. Solid. State. Chem.*, 1987, **69**(2), 320.
10. M. M. Borel, A. Leclaire, J. Chardon, B. Raveau, *J. Inorg. Mater.*, 2000, **2**(1), 11.
11. R. C. Haushalter, *J. Solid. State. Chem.*, 1990, **89**(1), 215.
12. S. L. Wang, K. H. Lii, *J. Solid. State. Chem.*, 1988, **73**(1), 274.
13. K. H. Lii and R. C. Haushalter, *Acta. Cryst.*, 1987, **C43**, 2036.
14. A. Guesdon, M. M. Borel, A. Lerlaire, A. Grandin and R. Raveau, *J. Solid. State. Chem.*, 1993, **108**, 46.
15. A. Guesdon, M. M. Borel, A. Lerlaire, A. Grandin and R. Raveau, *Z. anorg. allg. Chem.*, 1993, **619**, 1841.
16. J. J. Chen and K. H. Lii, *J. Solid. State. Chem.*, 1988, **76**(1), 204.
17. T. Hoareau, A. Leclaire, M. M. Borel, J. Provost, and B. Raveau, *J. Solid. State. Chem.*, 1995, **116**, 87.
18. K. H. Lii, R. C. Haushalter, P. C. O'Connor, *Angew. Chem.*, 1987, **99**(6), 576.
19. M. M. Borel, A. Leclaire, A. Guesdon, A. Grandin and B. Raveau, *J. Solid. State. Chem.*, 1994, **108**, 336.
20. M. M. Borel, A. Leclaire, A. Guesdon, A. Grandin and B. Raveau, *J. Solid. State. Chem.*, 1994, **112**, 15.
21. A. Leclaire, M. M. Borel and A. Guesdon, *J. Solid. State. Chem.*, 2001, **159**(1), 7.
22. Y. D. Riou, A. Leclaire, A. Grandin and B. Raveau, *Acta. Crystallogr.*, 1989, **C45**, 989.

23. A. Guesdon, A. Leclaire, M. M. Borel, A. Grandin and B. Raveau, *Acta. Crystallogr.*, 1994, **C50**, 1852.
24. A. Leclaire, A. Guesdon, M.M. Borel, F. Berrah, B. Raveau, *Solid State Sciences*, 2001, **3**(8), 877.
25. R. C. Haushalter, *J. Solid. State. Chem.*, 1987, **20**, 1566.
26. Y. Wang, S. L. Pan, H. W. Yu, X. Su, M. Zhang, F. F. Zhang, J. Han, *Chem. Commun.*, 2013, **49**, 306.
27. H. N. Liu, H. P. Wu, H. W. Yu, Z. G. Hu, J. Y. Wang and Y. C. Wu, *Inorg. Chem.*, 2020, **59**(8), 5742.
